# Supplementary material for: The Value of Fournier’s Gangrene Scoring Systems on Admission to Predict Mortality: A Systematic Review and Meta-Analysis
Source: MDPI journal article supplement (doi:10.3390/jpm13091283), 2023-08-22

**Supplementary Table S1.** National Institutes of Health (NIH) quality assessment tool for the included studies.

| Questions         | 1   | 2   | 3  | 4   | 5   | 6   | 7   | 8  | 9   | 10  | 11  | 12 | 13 | 14  |   |
|-------------------|-----|-----|----|-----|-----|-----|-----|----|-----|-----|-----|----|----|-----|---|
| Altarc, 2012      | Yes | No  | NA | No  | No  | Yes | Yes | NA | Yes | NR  | Yes | NR | NA | Yes | i |
| Aridogan, 2012    | Yes | Yes | NA | Yes | No  | Yes | Yes | NA | Yes | NR  | Yes | NR | NA | Yes | i |
| Arora, 2019       | Yes | Yes | NA | Yes | No  | Yes | Yes | NA | Yes | NR  | Yes | NR | NR | Yes | i |
| Bozkurt, 2023     | Yes | Yes | NA | Yes | No  | Yes | Yes | NA | Yes | NR  | Yes | NR | NA | Yes | i |
| Citgetz, 2019     | Yes | Yes | NA | Yes | Yes | Yes | Yes | NA | Yes | NR  | Yes | NR | NA | No  | i |
| Cocoran, 2008     | Yes | Yes | NA | Yes | No  | Yes | Yes | NA | Yes | NR  | Yes | NR | NA | Yes | i |
| Çomçalı, 2020     | Yes | Yes | NA | Yes | Yes | Yes | Yes | NA | Yes | NR  | Yes | NR | NA | Yes | i |
| Doluoğlu, 2016    | Yes | Yes | NA | Yes | No  | Yes | Yes | NA | Yes | Yes | Yes | NR | NA | Yes | i |
| Egin 2020         | Yes | Yes | NA | No  | No  | Yes | Yes | NA | Yes | Yes | Yes | NR | NA | Yes | i |
| Egin 2023         | Yes | Yes | NA | No  | No  | Yes | Yes | NA | Yes | Yes | Yes | NR | NA | Yes | i |
| Elsaket, 2018     | Yes | Yes | NA | Yes | Yes | Yes | Yes | NA | Yes | NR  | Yes | NR | NA | No  | i |
| Eray, 2021        | Yes | Yes | NA | Yes | No  | Yes | Yes | NA | Yes | NR  | Yes | NR | NA | Yes | i |
| Erol, 2015        | Yes | No  | NA | No  | No  | Yes | Yes | NA | Yes | NR  | Yes | NR | NA | Yes | i |
| Hong, 2017        | Yes | Yes | NA | Yes | No  | Yes | Yes | NA | Yes | NR  | Yes | NR | NA | Yes | i |
| Kabay, 2008       | Yes | Yes | NA | No  | No  | Yes | Yes | NA | Yes | Yes | Yes | NR | NA | Yes | i |
| Karaali, 2019     | Yes | Yes | NA | Yes | No  | Yes | Yes | NA | Yes | NR  | Yes | NR | NA | Yes | i |
| Lin, 2014         | Yes | Yes | NA | Yes | No  | Yes | Yes | NA | Yes | NR  | Yes | NR | NA | Yes | i |
| Luján Marco, 2009 | Yes | Yes | NA | Yes | No  | Yes | Yes | NA | Yes | NR  | Yes | NR | NA | No  | i |
| Noegroho, 2021    | Yes | Yes | NA | Yes | No  | Yes | Yes | NA | Yes | NR  | Yes | NR | NA | Yes | i |
| Oguz, 2015        | Yes | Yes | NA | Yes | No  | Yes | Yes | NA | Yes | NR  | Yes | NR | NA | Yes | i |
| Ongaro, 2023      | Yes | Yes | NA | Yes | No  | Yes | Yes | NA | Yes | NR  | Yes | NR | No | Yes | i |
| Oymaci, 2014      | Yes | Yes | NA | Yes | No  | Yes | Yes | NA | Yes | NR  | Yes | NR | NA | No  | i |
| Pehlivanlı, 2018  | Yes | Yes | NA | Yes | No  | Yes | Yes | NA | Yes | NR  | Yes | NR | NA | Yes | i |
| Roghmman, 2012    | Yes | Yes | NA | Yes | No  | Yes | Yes | NA | Yes | NR  | Yes | NR | NA | Yes | i |
| Sarvestani, 2013  | Yes | Yes | NA | Yes | No  | Yes | Yes | NA | Yes | NR  | Yes | NR | NA | YES | i |
| Tarchouli, 2015   | Yes | Yes | NA | Yes | No  | Yes | Yes | NA | Yes | NR  | Yes | NR | NA | Yes | i |
| Tenório, 2018     | Yes | Yes | NA | Yes | No  | Yes | Yes | NA | Yes | NR  | Yes | NR | NA | No  | i |
| Tosun, 2022       | Yes | Yes | NA | Yes | No  | Yes | Yes | NA | Yes | NR  | Yes | NR | NA | Yes | i |
| Tuncel, 2014      | Yes | Yes | NA | Yes | No  | Yes | Yes | NA | Yes | Yes | Yes | NR | NA | Yes | i |
| Ulug, 2009        | Yes | Yes | NA | Yes | No  | Yes | Yes | NA | Yes | NR  | Yes | NR | NA | Yes | i |
| Unalp, 2008       | Yes | Yes | NA | Yes | No  | Yes | Yes | NA | Yes | NR  | Yes | NR | NA | Yes | i |
| Ureyen, 2017      | Yes | Yes | NA | No  | No  | Yes | Yes | NA | Yes | NR  | Yes | NR | NA | Yes | i |
| Usta, 2020        | Yes | Yes | NA | Yes | No  | Yes | Yes | NA | Yes | NR  | Yes | NR | NA | Yes | i |
| Verma, 2012       | Yes | Yes | NA | No  | No  | Yes | Yes | NA | Yes | NR  | Yes | NR | NA | Yes | i |
| Vyas, 2013        | Yes | Yes | NA | Yes | No  | Yes | Yes | NA | Yes | NR  | Yes | NR | NA | Yes | i |
| Wang, 2012        | Yes | Yes | NA | Yes | No  | Yes | Yes | NA | Yes | NR  | Yes | NR | NA | Yes | i |
| Wetterauer, 2018  | Yes | Yes | NA | Yes | No  | Yes | Yes | NA | Yes | NR  | Yes | NR | NA | Yes | i |
| Yeniyol, 2004     | Yes | Yes | NA | Yes | No  | Yes | Yes | NA | Yes | Yes | Yes | NR | NA | Yes | i |
| Yilmazalar, 2010  | Yes | Yes | NA | Yes | No  | Yes | Yes | NA | Yes | NR  | Yes | NR | NA | No  | i |
| Yim, 2016         | Yes | Yes | NA | Yes | No  | Yes | Yes | NA | Yes | NR  | Yes | NR | NA | Yes | i |
|                   |     |     |    |     |     |     |     |    |     |     |     |    |    |     |   |
|                   |     |     |    |     |     |     |     |    |     |     |     |    |    |     |   |
|                   |     |     |    |     |     |     |     |    |     |     |     |    |    |     |   |
|                   |     |     |    |     |     |     |     |    |     |     |     |    |    |     |   |
|                   |     |     |    |     |     |     |     |    |     |     |     |    |    |     |   |
|                   |     |     |    |     |     |     |     |    |     |     |     |    |    |     |   |
|                   |     |     |    |     |     |     |     |    |     |     |     |    |    |     |   |
|                   |     |     |    |     |     |     |     |    |     |     |     |    |    |     |   |
|                   |     |     |    |     |     |     |     |    |     |     |     |    |    |     |   |
|                   |     |     |    |     |     |     |     |    |     |     |     |    |    |     |   |
|                   |     |     |    |     |     |     |     |    |     |     |     |    |    |     |   |
|                   |     |     |    |     |     |     |     |    |     |     |     |    |    |     |   |
|                   |     |     |    |     |     |     |     |    |     |     |     |    |    |     |   |
|                   |     |     |    |     |     |     |     |    |     |     |     |    |    |     |   |
|                   |     |     |    |     |     |     |     |    |     |     |     |    |    |     |   |
|                   |     |     |    |     |     |     |     |    |     |     |     |    |    |     |   |
|                   |     |     |    |     |     |     |     |    |     |     |     |    |    |     |   |
|                   |     |     |    |     |     |     |     |    |     |     |     |    |    |     |   |
|                   |     |     |    |     |     |     |     |    |     |     |     |    |    |     |   |
|                   |     |     |    |     |     |     |     |    |     |     |     |    |    |     |   |
|                   |     |     |    |     |     |     |     |    |     |     |     |    |    |     |   |
|                   |     |     |    |     |     |     |     |    |     |     |     |    |    |     |   |
|                   |     |     |    |     |     |     |     |    |     |     |     |    |    |     |   |
|                   |     |     |    |     |     |     |     |    |     |     |     |    |    |     |   |
|                   |     |     |    |     |     |     |     |    |     |     |     |    |    |     |   |
|                   |     |     |    |     |     |     |     |    |     |     |     |    |    |     |   |
|                   |     |     |    |     |     |     |     |    |     |     |     |    |    |     |   |
|                   |     |     |    |     |     |     |     |    |     |     |     |    |    |     |   |
|                   |     |     |    |     |     |     |     |    |     |     |     |    |    |     |   |
|                   |     |     |    |     |     |     |     |    |     |     |     |    |    |     |   |
|                   |     |     |    |     |     |     |     |    |     |     |     |    |    |     |   |
|                   |     |     |    |     |     |     |     |    |     |     |     |    |    |     |   |
|                   |     |     |    |     |     |     |     |    |     |     |     |    |    |     |   |
|                   |     |     |    |     |     |     |     |    |     |     |     |    |    |     |   |
|                   |     |     |    |     |     |     |     |    |     |     |     |    |    |     |   |
|                   |     |     |    |     |     |     |     |    |     |     |     |    |    |     |   |
|                   |     |     |    |     |     |     |     |    |     |     |     |    |    |     |   |
|                   |     |     |    |     |     |     |     |    |     |     |     |    |    |     |   |
|                   |     |     |    |     |     |     |     |    |     |     |     |    |    |     |   |
|                   |     |     |    |     |     |     |     |    |     |     |     |    |    |     |   |
|                   |     |     |    |     |     |     |     |    |     |     |     |    |    |     |   |
|                   |     |     |    |     |     |     |     |    |     |     |     |    |    |     |   |
|                   |     |     |    |     |     |     |     |    |     |     |     |    |    |     |   |
|                   |     |     |    |     |     |     |     |    |     |     |     |    |    |     |   |
|                   |     |     |    |     |     |     |     |    |     |     |     |    |    |     |   |
|                   |     |     |    |     |     |     |     |    |     |     |     |    |    |     |   |
|                   |     |     |    |     |     |     |     |    |     |     |     |    |    |     |   |
|                   |     |     |    |     |     |     |     |    |     |     |     |    |    |     |   |
|                   |     |     |    |     |     |     |     |    |     |     |     |    |    |     |   |
|                   |     |     |    |     |     |     |     |    |     |     |     |    |    |     |   |
|                   |     |     |    |     |     |     |     |    |     |     |     |    |    |     |   |
|                   |     |     |    |     |     |     |     |    |     |     |     |    |    |     |   |

**Supplementary Figure S1.** Publication bias analysis using the Funnel Plot including studies reporting FGSI.

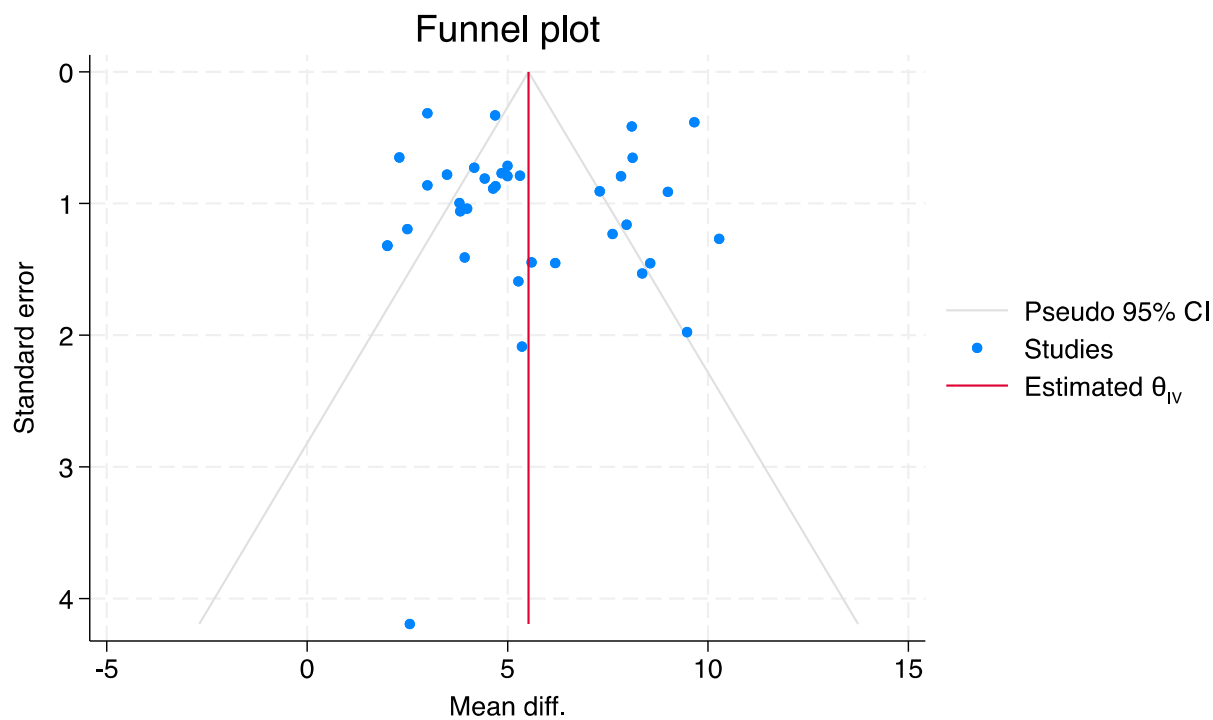

**Supplementary Figure S2.** Publication bias analysis using the Funnel Plot including studies reporting SFGSI.

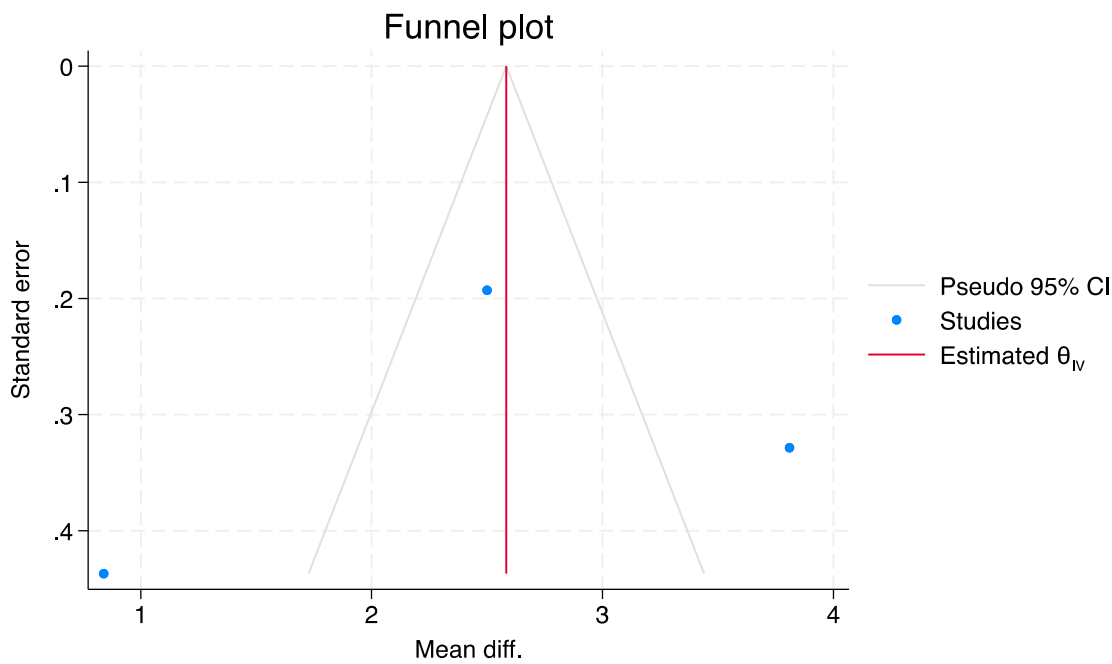

**Supplementary Figure S3.** Publication bias analysis using the Funnel Plot including studies reporting UFGSI.

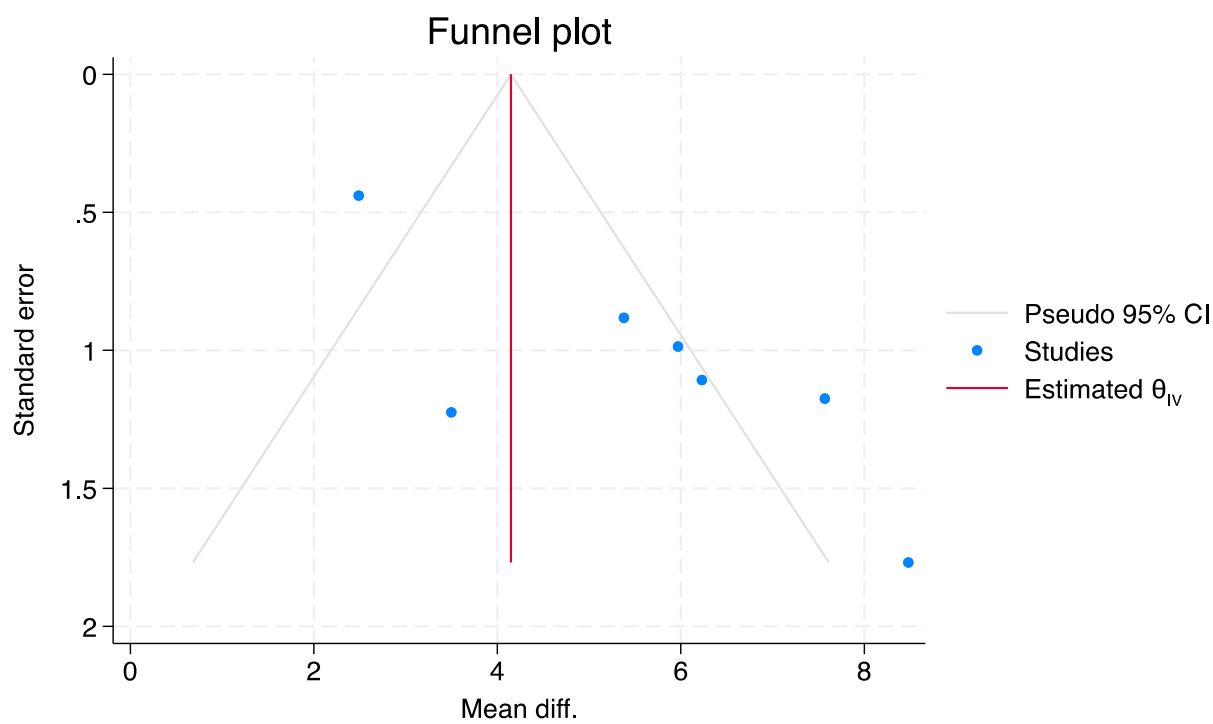

**Supplementary Figure S4.** Galbraith Plot including studies reporting FGSI.

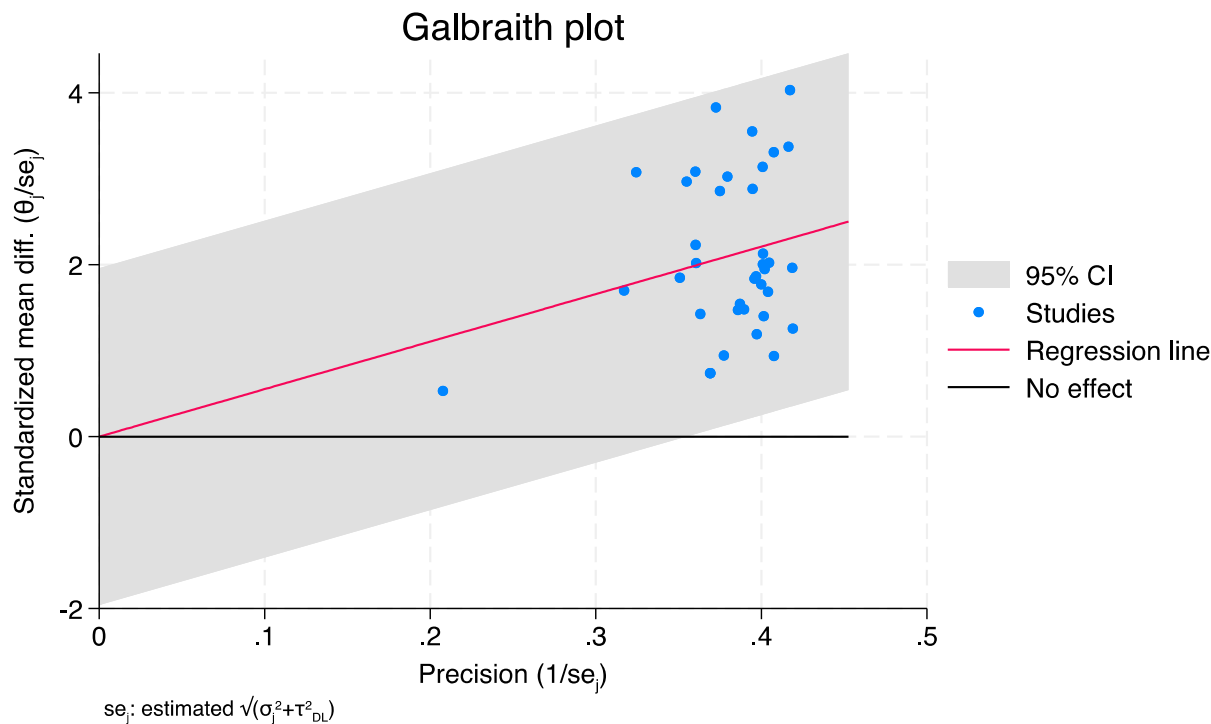

**Supplementary Figure S5.** Galbraith Plot including studies reporting SFGSI.

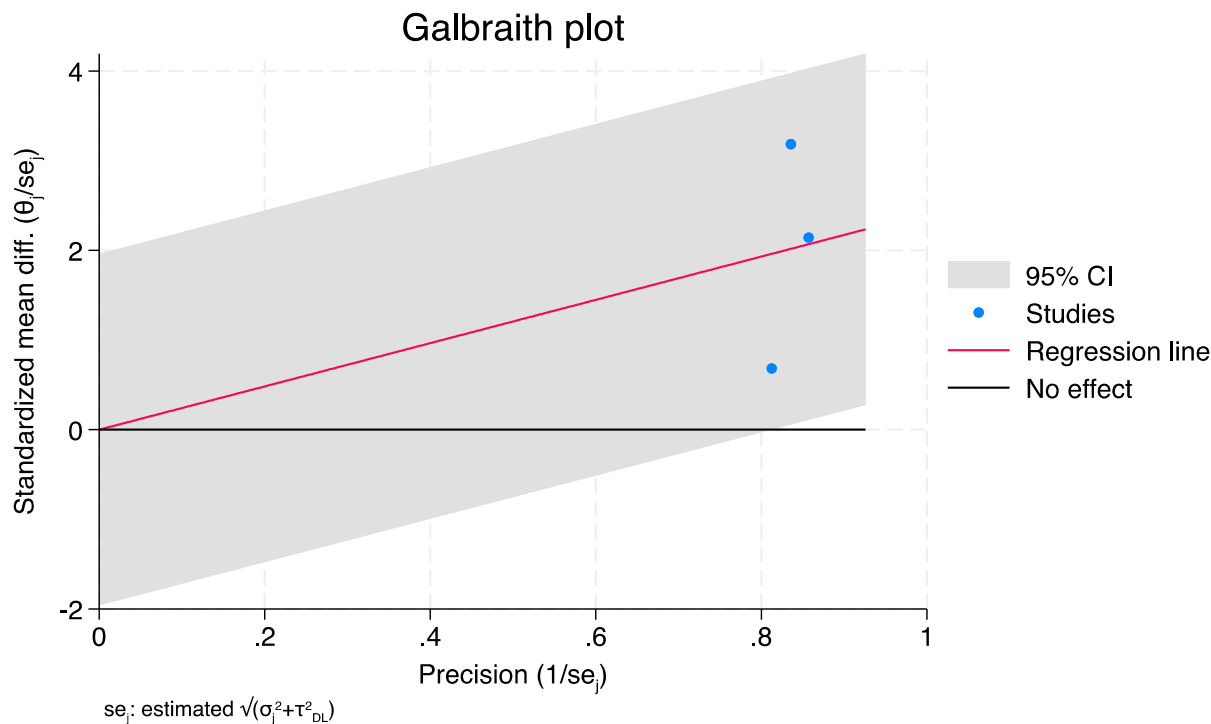

**Supplementary Figure S6.** Galbraith Plot including studies reporting UFGSI.

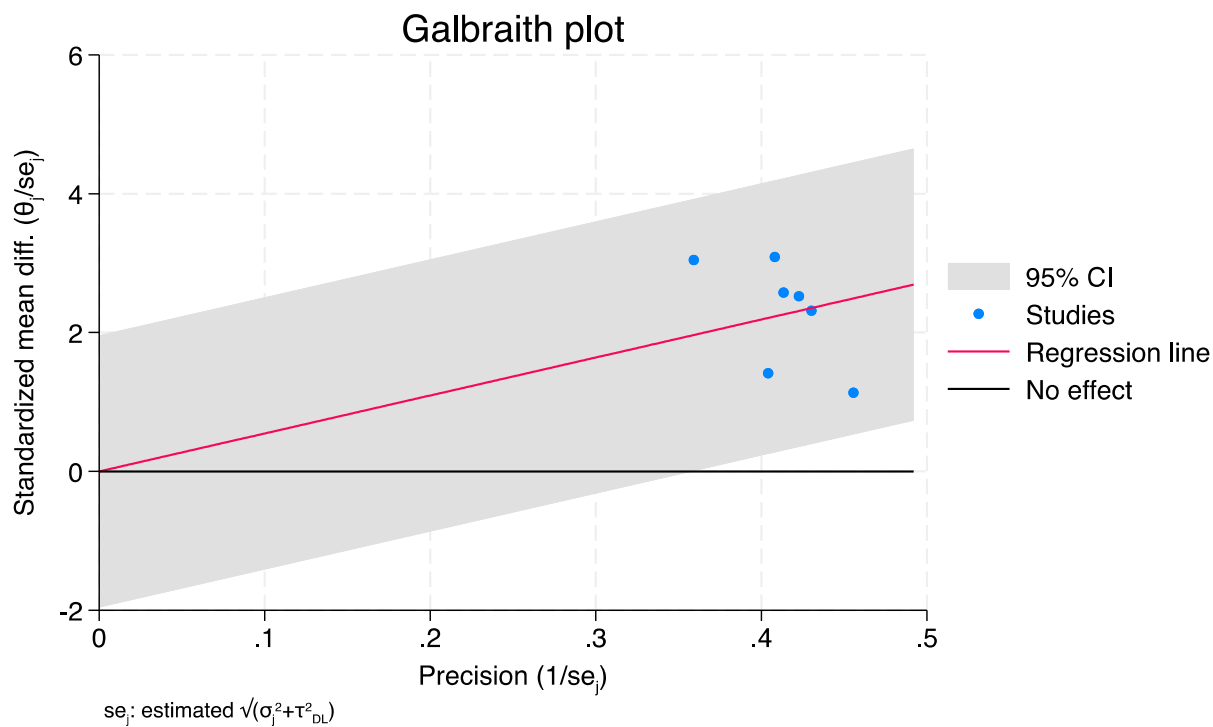

Supplement: s1 [file s1]
